# Supplementary material for: The gender and geography of publishing: a review of sex/gender reporting and author representation in leading general medical and global health journals
Source: PubMed Central journal article supplement (PMC8118011; doi:10.1136/bmjgh-2021-005672), 2021-05-13
Supplement: bmjgh-2021-005672supp001.pdf [file bmjgh-2021-005672supp001.pdf]

**Supplementary Table 1.**

| Journal specifies sex/gender reporting in author guidelines+ | Pre-specified sex/gender analysis | Reported gender of study participants | Stated how sex/gender was determined | Performed any form of sex/gender analysis | Sex or gender in discussion |
|--------------------------------------------------------------|-----------------------------------|---------------------------------------|--------------------------------------|-------------------------------------------|-----------------------------|
| NO                                                           | REF                               | REF                                   | REF                                  | REF                                       | REF                         |
| YES                                                          | 0.67                              | 3.69*                                 | 0.56                                 | 1.67                                      | 0.73                        |

\*  $p < 0.05$

+ Journals that specify sex/gender reporting in the author guidelines before 2018 (the year in which the articles in this analysis were published) include JAMA, JAMA IM, Lancet, and Lancet GH.
