# Supplementary material for: The gender and geography of publishing: a review of sex/gender reporting and author representation in leading general medical and global health journals
Source: PubMed Central journal article supplement (PMC8118011; doi:10.1136/bmjgh-2021-005672), 2021-05-13
Supplement: bmjgh-2021-005672supp002.pdf [file bmjgh-2021-005672supp002.pdf]

**Supplementary Table 2. Analysis by study type: proportion of RCTs and qualitative studies that incorporate sex/gender related reporting.**

| Sex/gender reporting framework                                                                             | Total (N=280) | RCTs (N=44) | Qualitative studies (N=33) |
|------------------------------------------------------------------------------------------------------------|---------------|-------------|----------------------------|
| Pre-specified sex/gender analysis                                                                          | 8%            | 0%          | 9%                         |
| Reported gender of study participants                                                                      | 72%           | 93%         | 55%                        |
| Percentage of female participants                                                                          |               |             |                            |
| 0%-25%                                                                                                     | 8%            | 13%         | 7%                         |
| 25%-50%                                                                                                    | 43%           | 49%         | 14%                        |
| 50%-75%                                                                                                    | 43%           | 38%         | 50%                        |
| 75%-100%                                                                                                   | 7%            | 0%          | 29%                        |
| Reported participation of transgender/non-binary participants                                              | 0.7%          | 0%          | 0%                         |
| Stated how sex/gender was determined                                                                       | 6%            | 5%          | 6%                         |
| Performed any form of analysis of sex/gender differences (excluding 8 articles w/ single sex participants) | 59%           | 66%         | 24%                        |
| Featured sex and/or gender in discussion                                                                   | 40%           | 27%         | 27%                        |
