# Supplementary material for: The gender and geography of publishing: a review of sex/gender reporting and author representation in leading general medical and global health journals
Source: PubMed Central journal article supplement (PMC8118011; doi:10.1136/bmjgh-2021-005672), 2021-05-13
Supplement: bmjgh-2021-005672supp003.pdf [file bmjgh-2021-005672supp003.pdf]

**Supplementary Table 3. Institutional affiliation of first and last authors by national income level and region, research and non-research articles**

| Income level and region - institutional affiliation | Research articles |                  |                  |                 | Non-research articles |                  |                  |                 |
|-----------------------------------------------------|-------------------|------------------|------------------|-----------------|-----------------------|------------------|------------------|-----------------|
|                                                     | First authors     |                  | Last authors     |                 | First authors         |                  | Last authors     |                 |
|                                                     | % first authors   | % women          | % last authors   | % women         | % first authors       | % women          | % last authors   | % women         |
| <b>High-income countries</b>                        | 69%<br>(194/280)  | 42%<br>(80/191)  | 74%<br>(204/277) | 22%<br>(44/204) | 82%<br>(206/250)      | 42%<br>(87/206)  | 82%<br>(155/190) | 32%<br>(50/155) |
| <b>Middle-income countries</b>                      | 19%<br>(54/280)   | 39%<br>(19/49)   | 16%<br>(43/277)  | 24%<br>(10/41)  | 13%<br>(33/250)       | 35%<br>(11/31)   | 14%<br>(26/190)  | 33%<br>(8/24)   |
| <b>Low-income countries</b>                         | 5%<br>(15/280)    | 15%<br>(2/13)    | 5%<br>(15/277)   | 33%<br>(4/12)   | 2%<br>(6/250)         | 67%<br>(4/6)     | 2%<br>(4/190)    | 50%<br>(2/4)    |
| <b>Dual affiliation</b>                             | 6%<br>(17/280)    | 35%<br>(6/17)    | 5%<br>(15/277)   | 33%<br>(5/15)   | 2%<br>(5/250)         | 60%<br>(3/5)     | 3%<br>(5/190)    | 20%<br>(1/5)    |
| <b>Northern America</b>                             | 36%<br>(102/280)  | 36%<br>(37/102)  | 40%<br>(110/277) | 21%<br>(23/110) | 43%<br>(108/250)      | 33%<br>(36/108)  | 44%<br>(83/190)  | 24%<br>(20/83)  |
| <b>Latin America and the Caribbean</b>              | 1%<br>(3/280)     | 33%<br>(1/3)     | 0.4%<br>(1/277)  | 0%<br>(0/1)     | 1%<br>(2/250)         | 0%<br>(0/2)      | 0%<br>(0/190)    | 0%<br>(0/0)     |
| <b>Europe</b>                                       | 28%<br>(77/280)   | 43%<br>(33/77)   | 29%<br>(81/277)  | 27%<br>(22/81)  | 32%<br>(81/250)       | 51%<br>(41/81)   | 32%<br>(61/190)  | 43%<br>(26/61)  |
| <b>Middle East and North Africa (MENA)</b>          | 3%<br>(9/280)     | 71%<br>(5/7)     | 3%<br>(7/277)    | 0%<br>(0/7)     | 0.4%<br>(1/250)       | 0%<br>(0/1)      | 1%<br>(2/190)    | 0%<br>(0/2)     |
| <b>Sub-Saharan Africa (SSA)</b>                     | 12%<br>(33/280)   | 32%<br>(10/31)   | 9%<br>(26/277)   | 30%<br>(7/23)   | 6%<br>(16/250)        | 40%<br>(6/15)    | 6%<br>(12/190)   | 25%<br>(3/12)   |
| <b>Asia</b>                                         | 11%<br>(32/280)   | 31%<br>(8/26)    | 10%<br>(27/277)  | 16%<br>(4/25)   | 8%<br>(20/250)        | 47%<br>(9/19)    | 9%<br>(17/190)   | 40%<br>(6/15)   |
| <b>Oceania</b>                                      | 1%<br>(4/280)     | 50%<br>(2/4)     | 3%<br>(7/277)    | 14%<br>(1/7)    | 6%<br>(14/250)        | 64%<br>(9/14)    | 5%<br>(9/190)    | 44%<br>(4/9)    |
| <b>Dual affiliation</b>                             | 7%<br>(20/280)    | 55%<br>(11/20)   | 7%<br>(18/277)   | 33%<br>(6/18)   | 3%<br>(8/250)         | 50%<br>(4/8)     | 3%<br>(6/190)    | 33%<br>(2/6)    |
| <b>Total</b>                                        | 100%              | 40%<br>(107/270) | 100%             | 23%<br>(63/272) | 100%                  | 40%<br>(105/248) | 100%             | 32%<br>(61/188) |

Notes: Single authors are included in the First Author calculation and excluded in Last Authors calculations. Where location of affiliation and/or gender of the author could not be determined, those authors were excluded from analysis, which accounts for shifting denominators. Eleven non-research articles authored by the journal were excluded from analysis.
